# Supplementary material for: Monodisperse magnetic ion imprinted polymeric microparticles prepared by RAFT polymerization based on γ-Fe2O3@meso-SiO2nanospheres for selective solid-phase extraction of Cu(ii) in water samples
Source: Royal Society of Chemistry journal article supplement (doi:10.1039/c5ra07022h), 2015-01-01

## Supporting Information

### Monodisperse Magnetic Ion Imprinted Polymeric Microparticles Prepared by RAFT Polymerization Based on $\gamma\text{-Fe}_2\text{O}_3@\text{meso-SiO}_2$ Nanospheres for Selective Solid-Phase Extraction of Cu(II) in Water Samples

**Fig. S1.** Analytical curve for Cu(II) with IIP-RAFT procedure.

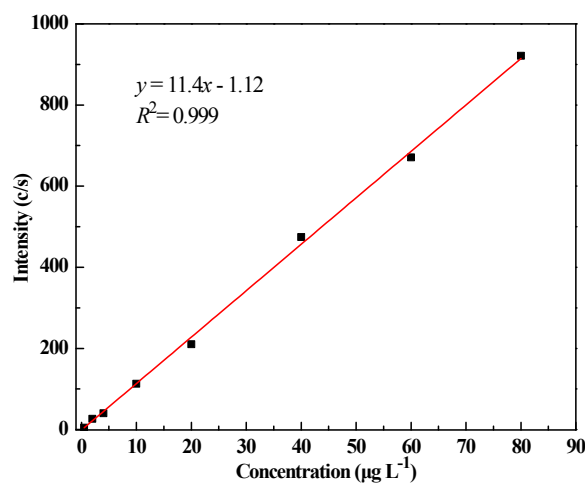

Supplement: c5ra07022h1.pdf [file c5ra07022h1.pdf]
